# Supplementary material
Source: Springer Nature journal article supplement (https://www.springermedizin.de/resource/supplementary/12885_2010_2764_MOESM4_ESM.PDF/9461816)
Supplement: MOESM4 [file 9461816]

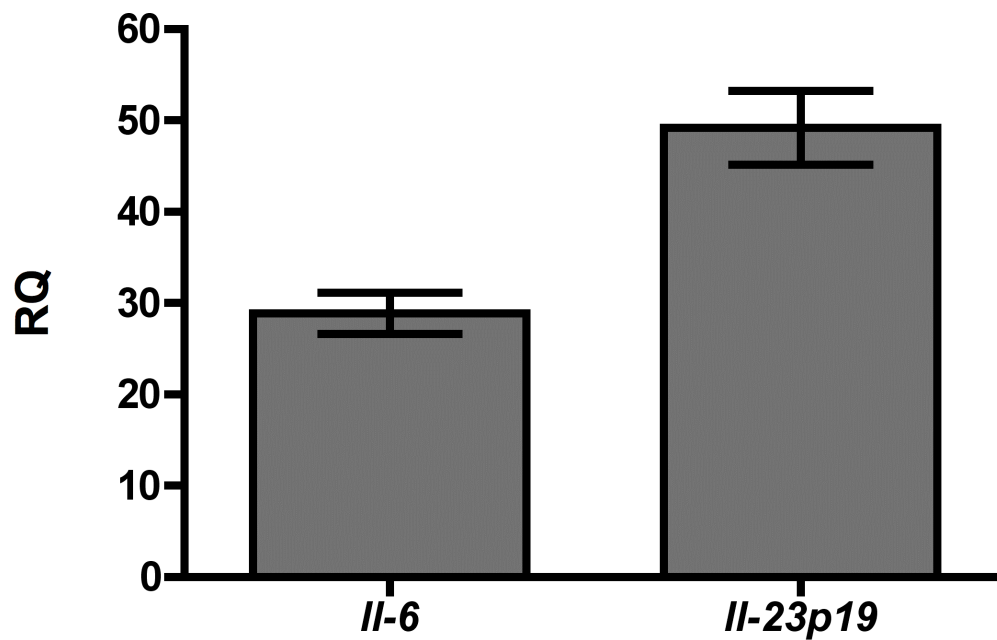

**Figure S3. ER stress in prostate cancer cells promotes transcription of proinflammatory cytokines.**

TC1 cells were treated with Tg (300 nM) for 18 h and assayed for *IL-6* and *IL-23p19* transcription by RT-qPCR. Data columns indicate the fold difference in transcript level between Tg- and vehicle-treated TC1 cells. Error bars represent SEM of 2 biological replicates representative of at least 3 independent experiments.
